# Supplementary material for: Comparative Analysis of Alternative Splicing in Two Contrasting Apple Cultivars Defense against Alternaria alternata Apple Pathotype Infection
Source: MDPI journal article supplement (doi:10.3390/ijms232214202), 2022-11-17
Supplement: s1 [file s1]

Supplementary Materials:

Table S1. Basic information statistics of RNA-Seq data

| SampleID | Clean reads | Reads_mapped |          | Uniq_mapped |               | Multi_mapped |          | GC (%) | Q20 (%) | Q30 (%) |
|----------|-------------|--------------|----------|-------------|---------------|--------------|----------|--------|---------|---------|
|          |             | Number       | Rate (%) | Number      | Rate (%)      | Number       | Rate (%) |        |         |         |
| J36CK1   | 45,082,848  | 36,236,275   | 80.38    | 36,166,654  | 99.81         | 69,621       | 0.19     | 47.52  | 97.86   | 93.87   |
| J36CK2   | 45,267,706  | 36,504,121   | 80.64    | 36,437,149  | 99.82         | 66,972       | 0.18     | 47.58  | 97.89   | 93.91   |
| J36HPI1  | 44,534,866  | 35,340,321   | 79.35    | 35,269,751  | 99.8          | 70,570       | 0.2      | 47.43  | 97.86   | 93.87   |
| J36HPI2  | 44,812,416  | 35,787,978   | 79.86    | 35,714,300  | 99.79         | 73,678       | 0.21     | 47.66  | 97.91   | 93.99   |
| J72CK1   | 44,802,036  | 35,906,025   | 80.14    | 35,839,931  | 99.82         | 66,094       | 0.18     | 47.21  | 97.89   | 93.95   |
| J72CK2   | 45,148,470  | 36,214,705   | 80.21    | 36,148,297  | 99.82         | 66,408       | 0.18     | 47.18  | 98.04   | 94.34   |
| J72HPI1  | 45,025,800  | 35,207,017   | 78.19    | 35,135,471  | 99.8          | 71,546       | 0.2      | 47.39  | 97.85   | 93.85   |
| J72HPI2  | 44,530,830  | 34,737,777   | 78.01    | 34,663,166  | 99.79         | 74,611       | 0.21     | 47.17  | 97.95   | 94.09   |
| SD36CK1  | 43,677,740  | 34,796,946   | 79.67    | 34,729,859  | 99.81         | 67,087       | 0.19     | 47.58  | 97.92   | 94.01   |
| SD36CK2  | 45,285,140  | 35,685,868   | 78.8     | 35,616,645  | 99.81         | 69,223       | 0.19     | 47.58  | 97.84   | 93.83   |
| SD36HPI1 | 44,133,228  | 34,637,368   | 78.48    | 34,558,628  | 99.77         | 78,740       | 0.23     | 47.39  | 98      | 94.23   |
| SD36HPI2 | 44,935,748  | 35,165,761   | 78.26    | 35,089,434  | 99.78         | 76,327       | 0.22     | 47.4   | 97.91   | 93.99   |
| SD72CK1  | 44,205,606  | 34,401,382   | 77.82    | 34,332,318  | 99.8          | 69,064       | 0.2      | 47.42  | 97.61   | 93.23   |
| SD72CK2  | 44,171,876  | 34,700,124   | 78.56    | 34,631,400  | 99.8          | 68,724       | 0.2      | 47.38  | 97.92   | 94.01   |
| SD72HPI1 | 42,053,790  | 33,121,273   | 78.76    | 33,047,853  | 99.78         | 73,420       | 0.22     | 47.33  | 97.94   | 94.07   |
| SD72HPI2 | 44,911,788  | 35,290,246   | 78.58    | 35,215,616  | 99.79         | 74,630       | 0.21     | 47.37  | 97.94   | 94.08   |
| Average  | 44,536,243  | 35,233,324   | 79.11    | 35,162,280  | 99.79<br>9375 | 71,045       | 0.2      | 47.41  | 97.90   | 93.96   |

**Table S2.** The number and percentage of different type AS events

| groups | A3SS     | RI       | A5SS     | SE       | MXE     | AS_event.no |
|--------|----------|----------|----------|----------|---------|-------------|
| J36    | 9040     | 6531     | 4500     | 4220     | 117     | 24,408      |
|        | (37.04%) | (26.76%) | (18.44%) | (17.29%) | (0.48%) |             |
| J72    | 8947     | 6622     | 4485     | 4359     | 113     | 24,526      |
|        | (36.48%) | (27%)    | (18.29%) | (17.77%) | (0.46%) |             |
| SD36   | 9164     | 6716     | 4560     | 4086     | 107     | 24,633      |
|        | (37.20%) | (27.26%) | (18.51%) | (16.59%) | (0.43%) |             |
| SD72   | 9094     | 6769     | 4483     | 4094     | 110     | 24,550      |
|        | (37.04%) | (27.57%) | (18.26%) | (16.68%) | (0.45%) |             |
| total  | 13,084   | 9004     | 6398     | 6125     | 142     | 34,753      |
|        | (37.65%) | (25.91%) | (18.41%) | (17.62%) | (0.41%) |             |

**Table S3.** The number and percentage of different type AS genes

| groups | A3SS     | RI       | A5SS     | SE       | MXE     | AS_gene.no |
|--------|----------|----------|----------|----------|---------|------------|
| J36    | 5472     | 3653     | 3288     | 2777     | 97      | 9366       |
|        | (58.42%) | (39%)    | (35.11%) | (29.65%) | (1.04%) |            |
| J72    | 5438     | 3680     | 3286     | 2829     | 97      | 9297       |
|        | (58.49%) | (39.58%) | (35.34%) | (30.43%) | (1.04%) |            |
| SD36   | 5539     | 3758     | 3329     | 2690     | 94      | 9458       |
|        | (58.56%) | (39.73%) | (35.20%) | (28.44%) | (0.99%) |            |
| SD72   | 5476     | 3794     | 3285     | 2709     | 94      | 9346       |
|        | (58.59%) | (40.59%) | (35.15%) | (28.99%) | (1.01%) |            |
| total  | 7073     | 4640     | 4353     | 3793     | 117     | 11,421     |
|        | (61.93%) | (40.63%) | (38.11%) | (33.21%) | (1.02%) |            |

**Table S4.** The number and percentage of DAS events

| groups | RI           | A3SS         | A5SS         | SE           | MXE       | total       |
|--------|--------------|--------------|--------------|--------------|-----------|-------------|
| J36    | 750 (36.93%) | 669 (32.94%) | 350 (17.23%) | 255 (12.56%) | 7 (0.34%) | 2031 (100%) |
| J72    | 919 (37.91%) | 779 (32.14%) | 405 (16.71%) | 312 (12.87%) | 9 (0.37%) | 2424 (100%) |
| SD36   | 654 (35.41%) | 606 (32.81%) | 309 (16.73%) | 277 (15%)    | 1 (0.05%) | 1847 (100%) |
| SD72   | 884 (38.49%) | 759 (33.04%) | 371 (16.15%) | 280 (12.19%) | 3 (0.13%) | 2297 (100%) |

**Table S5.** Primers used in RT-PCR validation of AS events

| gene ID             | primers   | sequences (5'-3')         |
|---------------------|-----------|---------------------------|
| <i>MD01G1087300</i> | MdCIPK9-F | GTAAGGAAGGGGCGCAAGAT      |
|                     | MdCIPK9-R | TTCGTCAAAGAGCTCACCCC      |
| <i>MD06G1093000</i> | MdRBOHA-F | CCAAGCCCTTCAATAGGCTCA     |
|                     | MdRBOHA-R | TGATTGGGAGAACCTATACTTCCAG |
| <i>MD07G1199400</i> | MdNAK-F   | TCAATTTTTTCCGCTGTTCG      |
|                     | MdNAK-R   | CATCAACCCACCCCTTAAAGA     |
| <i>MD08G1187200</i> | MdSAPK2-F | AGTCCAGCACCCCGTGTAAG      |
|                     | MdSAPK2-R | AAGGTGACTCCACAAGACCAAAC   |

|              |             |                            |
|--------------|-------------|----------------------------|
| MD09G1155800 | MdTNNI3K-F  | CATTcAGGGATGAGCTTGCTTT     |
|              | MdTNNI3K-R  | GCTTGCTCACCCCAAAGTCT       |
| MD09G1188000 | MdPP2C50-F  | TGAGCTGTCTGAGATCCAGGAA     |
|              | MdPP2C50-R  | TCCACCCACCAATTCTCTCAA      |
| MD09G1236700 | MdEDR1-F    | TATTGATGGAGTCGTTGAGTCTG    |
|              | MdEDR1-R    | CTGTAGCTTGAGGTAGGCATGT     |
| MD13G1108000 | MdLRR-F     | TTTGCTTTCTGTCATCTGTTGTTTC  |
|              | MdLRR-R     | GGACTAAATACCTCCTCCTCTCC    |
| MD13G1241800 | MdPRH-F     | TCAGATACGCAAGTTAGAAGGTCAT  |
|              | MdPRH-R     | TCTCCTTTGTTTCGTGTATTCTTAAG |
| MD15G1099600 | MdAFC3-F    | GAGAGTATGTGGCAATCAAGGTA    |
|              | MdAFC3-R    | ACAGATCACAGGGGTAAGTCCA     |
| MD16G1103500 | MdAFC2-F    | AAATGGATTACGTGTCGGAGTTC    |
|              | MdAFC2-R    | TGACCAAAAGTTCCTTCACCAA     |
| MD04G1113100 | MdWRKY44-F  | GCGTTTCGGTACATGTGCTT       |
|              | MdWRKY44-R  | TGGCTCAAGATGTGTAAAGTTCA    |
| MD05G1127000 | MdLRR10-F   | GTAAACACCATTACGCAGATCC     |
|              | MdLRR10-R   | GAGCAAAGTTATGACGGAGATAGAT  |
| MD08G1196900 | MdAGL24-F   | AGTAAGGAACTTGAGGATAAGACCC  |
|              | MdAGL24-R   | CATTATTcAGGTTTTCCAACCTCCA  |
| MD08G1222300 | MdNAC1-F    | ACGAAGAACTTGTAGTCCATTTCCT  |
|              | MdNAC1-R    | CTTCAATGCCTAATGTTTTCCAG    |
| MD10G1342000 | MdAPL-F     | AAGAGGGGAGAAAAACAACCTCTC   |
|              | MdAPL-R     | TTGTCCGCATAATAGCCTTTG      |
| MD15G1081800 | MdABI5-F    | ACCTGCGAACCAGTTGTCAT       |
|              | MdABI5-R    | CAACTTCTGCTTCCAATTCCAT     |
| MD15G1208900 | MdbHLH041-F | CAGGATTcGCTTTCAGGAATAGTAT  |
|              | MdbHLH041-R | ATGTTGAAGAGGAGGGAGGAAT     |
| MD02G1151300 | MdU2af65-F  | CTGAACGGTATTAAAATGGGTGAC   |
|              | MdU2af65-R  | CATACCAGGATACACGATACAACCTC |
| MD13G1218500 | MdRRM1-F    | ACCGAGGAAGAGAAGAACCG       |
|              | MdRRM1-R    | ACTCCACAACAGCTTGACCT       |

**Table S6.** General information of AS genes validated by RT-PCR

| geneID       | gene_name | Chr    | strand | AS_type | AS_position | AS_length | nr_annotation                                                                                   |
|--------------|-----------|--------|--------|---------|-------------|-----------|-------------------------------------------------------------------------------------------------|
| MD01G1087300 | MdCIPK9   | Chr 01 | +      | RI      | intron1     | 488bp     | PREDICTED:<br>CBL-interacting<br>serine/threonine-protein<br>kinase 9-like [Malus<br>domestica] |
| MD06G1093000 | MdRBOHA   | Chr 06 | +      | SE      | exon7       | 96bp      | PREDICTED: respiratory<br>burst oxidase homolog<br>protein A [Pyrus x                           |

|                                |                 |           |   |      |         |                           |                                                                                                               |
|--------------------------------|-----------------|-----------|---|------|---------|---------------------------|---------------------------------------------------------------------------------------------------------------|
| <i>MD07G1</i><br><i>199400</i> | <i>MdNAK</i>    | Chr<br>07 | + | SE   | exon2   | 92bp                      | bretschneideri]<br>PREDICTED: probable<br>serine/threonine-protein<br>kinase NAK [Malus<br>domestica]         |
| <i>MD08G1</i><br><i>187200</i> | <i>MdSAPK2</i>  | Chr<br>08 | - | A3SS | intron5 | 34bp                      | serine/threonine-protein<br>kinase SAPK2 [Malus<br>domestica]                                                 |
| <i>MD09G1</i><br><i>155800</i> | <i>MdTNNI3K</i> | Chr<br>09 | - | SE   | exon7   | 104bp                     | PREDICTED:<br>serine/threonine-protein<br>kinase TNNI3K [Malus<br>domestica]                                  |
| <i>MD09G1</i><br><i>188000</i> | <i>MdPP2C50</i> | Chr<br>09 | - | RI   | intron2 | 102bp                     | PREDICTED: probable<br>protein phosphatase 2C<br>50 [Malus domestica]                                         |
| <i>MD09G1</i><br><i>236700</i> | <i>MdEDR1</i>   | Chr<br>09 | + | SE   | exon7   | 90bp                      | PREDICTED:<br>serine/threonine-protein<br>kinase EDR1-like [Malus<br>domestica]                               |
| <i>MD13G1</i><br><i>108000</i> | <i>MdLRR</i>    | Chr<br>13 | - | RI   | intron1 | 123bp                     | PREDICTED: probable<br>LRR receptor-like<br>serine/threonine-protein<br>kinase At1g67720 [Malus<br>domestica] |
| <i>MD13G1</i><br><i>241800</i> | <i>MdPRH</i>    | Chr<br>13 | - | A5SS | intron8 | 66bp                      | PREDICTED:<br>pathogenesis-related<br>homeodomain<br>protein-like isoform X2<br>[Malus domestica]             |
| <i>MD15G1</i><br><i>099600</i> | <i>MdAFC3</i>   | Chr<br>15 | + | SE   | exon6-8 | 355bp,<br>263bp,<br>115bp | PREDICTED:<br>serine/threonine-protein<br>kinase AFC3 [Pyrus x<br>bretschneideri]                             |
| <i>MD16G1</i><br><i>103500</i> | <i>MdAFC2</i>   | Chr<br>16 | - | SE   | exon2   | 187bp                     | PREDICTED:<br>serine/threonine-protein<br>kinase AFC2-like isoform<br>X1 [Malus domestica]                    |
| <i>MD04G1</i><br><i>113100</i> | <i>MdWRKY44</i> | Chr<br>04 | - | A5SS | intron1 | 111bp                     | PREDICTED: WRKY<br>transcription factor<br>44-like [Malus<br>domestica]                                       |
| <i>MD05G1</i><br><i>127000</i> | <i>MdLRR10</i>  | Chr<br>05 | - | SE   | exon3   | 94bp                      | PREDICTED:<br>F-box/LRR-repeat<br>protein 10 [Malus                                                           |

|                                |                  |           |   |             |          |                 |                                                                                                       |
|--------------------------------|------------------|-----------|---|-------------|----------|-----------------|-------------------------------------------------------------------------------------------------------|
|                                |                  |           |   |             |          |                 | domestica]                                                                                            |
| <i>MD08G1</i><br><i>196900</i> | <i>MdAGL24</i>   | Chr<br>08 | + | SE          | exon6    | 42bp            | PREDICTED: MADS-box<br>protein AGL24-like<br>isoform X1 [Pyrus x<br>bretschneideri]                   |
| <i>MD08G1</i><br><i>222300</i> | <i>MdNAC1</i>    | Chr<br>08 | + | A5SS        | intron1  | 81bp            | PREDICTED: LOW<br>QUALITY PROTEIN:<br>NAC transcription factor<br>NAM-1-like [Malus<br>domestica]     |
| <i>MD10G1</i><br><i>342000</i> | <i>MdAPL</i>     | Chr<br>10 | + | RI          | intron1  | 392bp           | PREDICTED: myb family<br>transcription factor<br>APL-like isoform X2<br>[Malus domestica]             |
| <i>MD15G1</i><br><i>081800</i> | <i>MdABI5</i>    | Chr<br>15 | - | SE          | exon2    | 110bp           | PREDICTED: ABSCISIC<br>ACID-INSENSITIVE<br>5-like protein 5 isoform<br>X1 [Pyrus x<br>bretschneideri] |
| <i>MD15G1</i><br><i>208900</i> | <i>MdbHLH041</i> | Chr<br>15 | + | RI,A5<br>SS | intron4  | 239bp,<br>157bp | PREDICTED: putative<br>transcription factor<br>bHLH041 [Malus<br>domestica]                           |
| <i>MD02G1</i><br><i>151300</i> | <i>MdU2af65</i>  | Chr<br>02 | - | A3SS        | intron12 | 139bp           | PREDICTED: splicing<br>factor U2af large subunit<br>A-like isoform X7 [Malus<br>domestica]            |
| <i>MD13G1</i><br><i>218500</i> | <i>MdU2af50</i>  | Chr<br>13 | - | A5SS        | intron2  | 327bp           | PREDICTED: splicing<br>factor U2af large subunit<br>A-like isoform X1 [Malus<br>domestica]            |

---
